# Supplementary material
Source: Springer Nature journal article supplement (https://www.springermedizin.de/resource/supplementary/12889_2008_1432_MOESM2_ESM.pdf/9503742)
Supplement: MOESM2 [file 9503742]

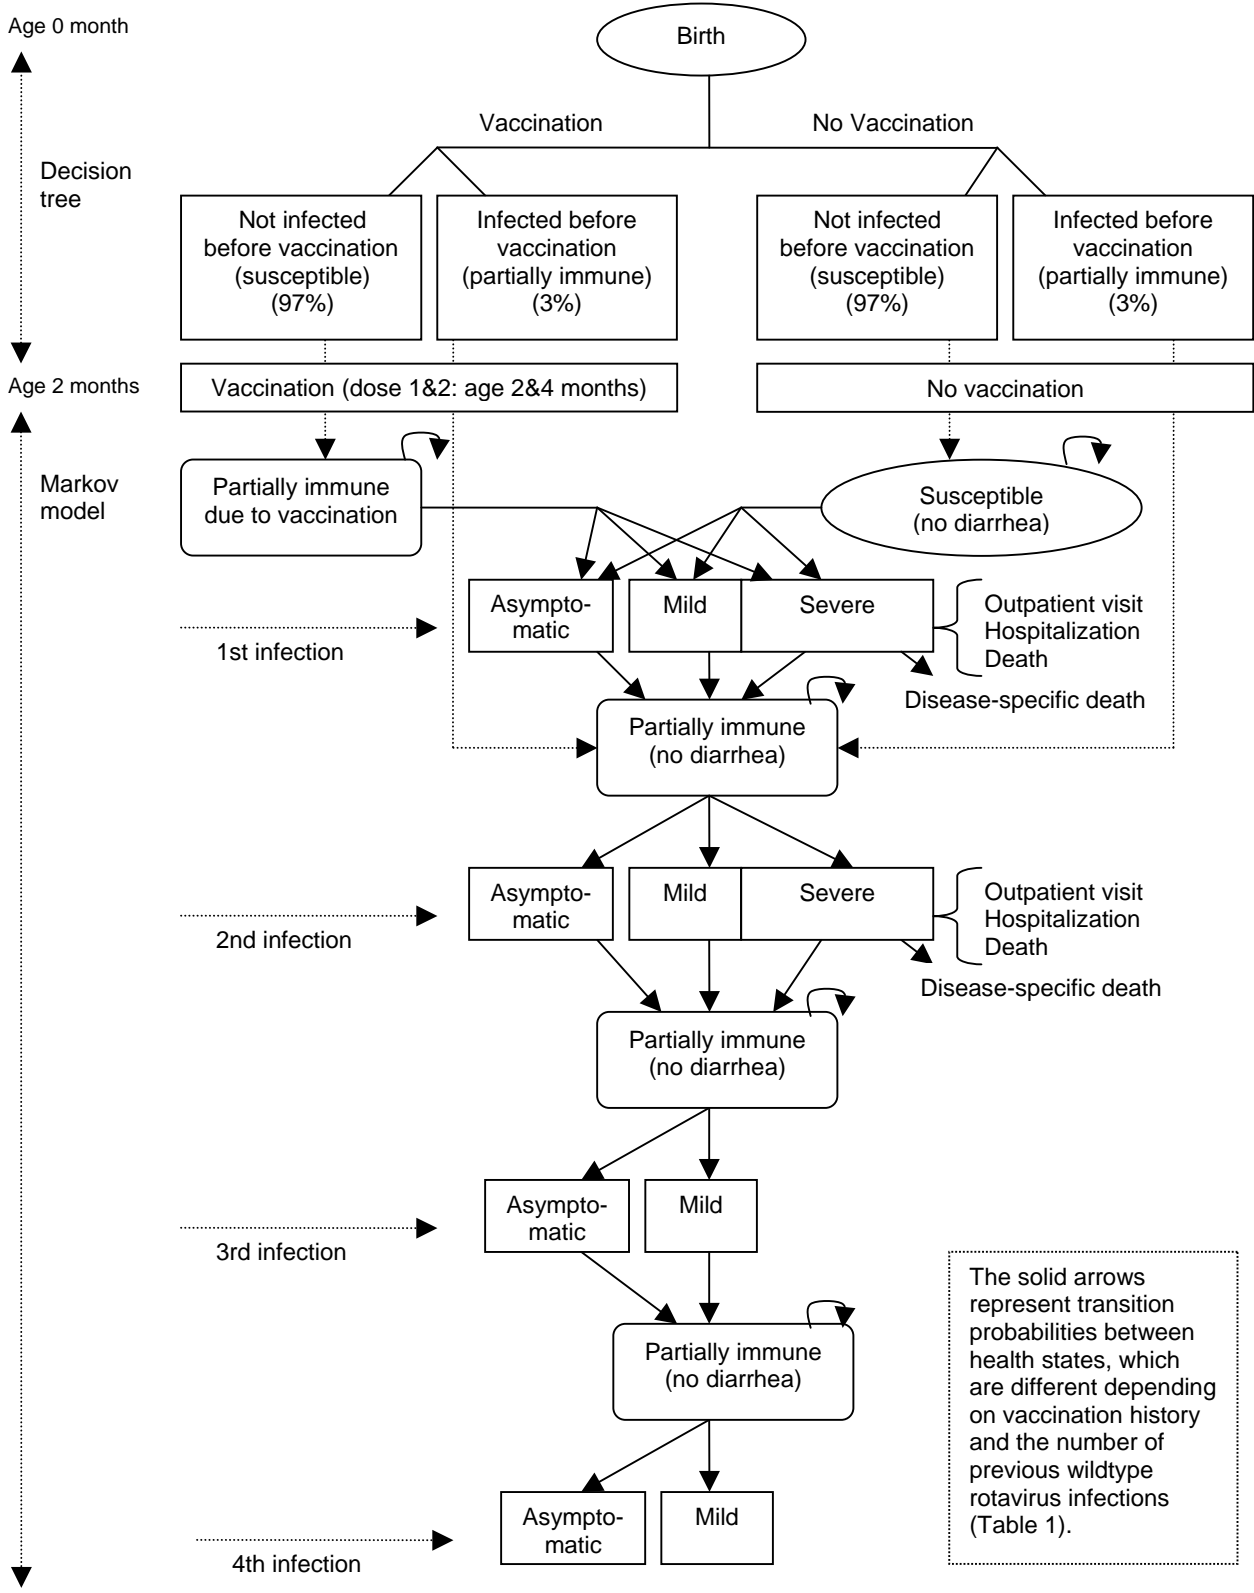

\* Deaths due to other causes occur at every stage according to the local background mortality but are not shown.
